# Supplementary material for: Frequency and severity of respiratory infections prior to COPD diagnosis and risk of subsequent postdiagnosis COPD exacerbations and mortality: EXACOS-UK health care data study
Source: PubMed Central journal article supplement — Thorax. 2022 Oct 31;78(8):760–6. doi: 10.1136/thorax-2022-219039 (PMC10359568; doi:10.1136/thorax-2022-219039), 2022-10-31
Supplement: thorax-2022-219039supp001.pdf [file thorax-2022-219039supp001.pdf]

## **Frequency and severity of respiratory infections prior to COPD diagnosis and risk of future exacerbations and mortality: a UK routine health care data study**

Supplementary material

### Contents

|                                                                                                                                                                                                                       |    |
|-----------------------------------------------------------------------------------------------------------------------------------------------------------------------------------------------------------------------|----|
| <b>Additional methodology</b> .....                                                                                                                                                                                   | 2  |
| <b>Table S1: Incidence rates of at least one AECOPD (moderate or severe) following COPD diagnosis in different categories of baseline frequency and severity of LRTI</b> .....                                        | 3  |
| <b>Table S2: Incidence rates of at least one moderate AECOPD following COPD diagnosis in different categories of baseline frequency and severity of LRTI</b> .....                                                    | 4  |
| <b>Table S3: Incidence rates of at least one severe AECOPD following COPD diagnosis in different categories of baseline frequency and severity of LRTI</b> .....                                                      | 5  |
| <b>Table S4: Hazard ratios for all-cause mortality following COPD diagnosis in different categories of baseline frequency and severity of LRTI</b> .....                                                              | 6  |
| <b>Table S5: Hazard ratios for COPD-related mortality following COPD diagnosis in different categories of baseline frequency and severity of LRTI</b> .....                                                           | 7  |
| <b>Table S6: Hazard ratios for CVD-related mortality following COPD diagnosis in different categories of baseline frequency and severity of LRTI</b> .....                                                            | 8  |
| <b>Table S7: Incidence rates of at least one AECOPD (moderate or severe) following COPD diagnosis in different categories of baseline frequency and severity of LRTI (mild and moderate GP events combined)</b> ..... | 9  |
| <b>Figure S1: Inclusion of COPD patients</b> .....                                                                                                                                                                    | 10 |

### **Additional methodology**

Analyses were performed in STATA17. Baseline characteristics were defined prior to COPD diagnosis. These included age, sex, smoking status (current or ex-smoker), BMI, history of depression, anxiety disorder, gastro-oesophageal reflux disease (GORD), lung cancer, myocardial infarction, heart failure and stroke, current asthma, socioeconomic deprivation, Medical Research Council (MRC) dyspnoea score, GOLD-defined airflow obstruction, and current elevated blood eosinophil level (using threshold of 300 cells/ $\mu$ l). These characteristics were described overall and by LRTI exposure sub-group using mean (SD) for continuous measures and numbers (%) for categorical measures. They included age at index date, sex, closest smoking status to index date (current or ex-smoker), current BMI within 5 years of index date (underweight <18.5kg/m<sup>2</sup>, normal 18.5-24.9kg/m<sup>2</sup>, overweight 25.0-29.9kg/m<sup>2</sup>, and obese  $\leq$ 30.0kg/m<sup>2</sup>), history of depression, anxiety disorder, gastro-oesophageal reflux disease (GORD), lung cancer, myocardial infarction, heart failure and stroke ever recorded prior to index date, current asthma defined in a period of 3 years 2 years prior to index date, current socioeconomic deprivation using the Index of Multiple Deprivation (categorized into quintiles), current Medical Research Council (MRC) dyspnoea score identified within 2 years of index date (1-5, a higher score indicating more severe dyspnoea), current GOLD-defined airflow obstruction defined within 2 years of index date (GOLD 1: FEV1 % predicted  $\geq$ 80%; GOLD 2: FEV1 % predicted 50-79%; GOLD 3: FEV1 % predicted 30-49%; GOLD 4: FEV1 % predicted <30%), and current elevated blood eosinophil level defined within 1 years of index date (using threshold of 300 cells/ $\mu$ l).

**Table S1: Incidence rates of at least one AECOPD (moderate or severe) following COPD diagnosis in different categories of baseline frequency and severity of LRTI**

| Baseline LRTI category              | n (%) of events<br>N=948,576 | Rate 100py <sup>-1</sup> (95% CI) | Crude IRR (95% CI) | Adjusted* IRR (95% CI) |
|-------------------------------------|------------------------------|-----------------------------------|--------------------|------------------------|
| <b>No LRTI<br/>n=158,074</b>        | 512,658                      | 61.9 (61.7 – 62.1)                | Reference          | Reference              |
| <b>1 mild LRTI<br/>n=18,081</b>     | 52,232                       | 72.0 (71.3 – 72.6)                | 1.18 (1.15-1.20)   | 1.16 (1.14-1.18)       |
| <b>2+ mild LRTI<br/>n=6,133</b>     | 21,717                       | 95.7 (94.5 – 97.0)                | 1.56 (1.51-1.61)   | 1.51 (1.46-1.55)       |
| <b>1 moderate LRTI<br/>n=19,787</b> | 145,161                      | 113.2 (112.6 – 113.8)             | 1.92 (1.88-1.95)   | 1.81 (1.78-1.85)       |
| <b>2+ moderate LRTI<br/>n=6,227</b> | 68,822                       | 168.2 (167.0 – 169.5)             | 2.88 (2.80-2.97)   | 2.55 (2.48-2.63)       |
| <b>1+ severe LRTI<br/>n=6,932</b>   | 22,280                       | 96.1 (94.8 – 97.4)                | 2.05 (1.99-2.12)   | 1.75 (1.70-1.80)       |

Legend: AECOPD (Acute Exacerbations of Chronic Obstructive Pulmonary Disease), LRTI (Lower Respiratory Tract Infection), IRR (Incidence Rate Ratio). PY (Person years). \*Adjusted for all baseline covariates listed in Table 1. Number of patients included crude and fully adjusted models N= 215,234.

**Table S2: Incidence rates of at least one moderate AECOPD following COPD diagnosis in different categories of baseline frequency and severity of LRTI**

| Baseline LRTI category             | n (%) of events<br>N=948,576 | Rate 100py <sup>-1</sup> (95% CI) | Crude IRR (95% CI) | Adjusted* IRR (95% CI) |
|------------------------------------|------------------------------|-----------------------------------|--------------------|------------------------|
| <b>No LRTI</b><br>n=158,074        | 512,658                      | 61.9 (61.7 – 62.1)                | Ref                | Ref                    |
| <b>1 mild LRTI</b><br>n=18,081     | 52,232                       | 72.0 (71.3 – 72.6)                | 1.14 (1.12-1.16)   | 1.14 (1.12-1.16)       |
| <b>2+ mild LRTI</b><br>n=6,133     | 21,717                       | 95.7 (94.5 – 97.0)                | 1.54 (1.49-1.59)   | 1.50 (1.45-1.55)       |
| <b>1 moderate LRTI</b><br>n=19,787 | 145,161                      | 113.2 (112.6 – 113.8)             | 2.02 (1.98-2.06)   | 1.90 (1.87-1.94)       |
| <b>2+ moderate LRTI</b><br>n=6,227 | 68,822                       | 168.2 (167.0 – 169.5)             | 3.08 (2.98-3.17)   | 2.71 (2.64-2.79)       |
| <b>1+ severe LRTI</b><br>n=6,932   | 22,280                       | 96.1 (94.8 – 97.4)                | 1.60 (1.55-1.66)   | 1.44 (1.39-1.49)       |

Legend: AECOPD (Acute Exacerbations of Chronic Obstructive Pulmonary Disease), LRTI (Lower Respiratory Tract Infection), IRR (Incidence Rate Ratio), PY (Person years). \*Adjusted for all baseline covariates listed in Table 1. Number of patients included crude and fully adjusted models N= 215,234.

**Table S3: Incidence rates of at least one severe AECOPD following COPD diagnosis in different categories of baseline frequency and severity of LRTI**

| Baseline LRTI category             | n (%) of events<br>N=948,576 | Rate 100py <sup>-1</sup> (95% CI) | Crude IRR (95% CI) | Adjusted* IRR (95% CI) |
|------------------------------------|------------------------------|-----------------------------------|--------------------|------------------------|
| <b>No LRTI</b><br>n=158,074        | 81,259                       | 9.8 (9.7 – 9.9)                   | Ref                | Ref                    |
| <b>1 mild LRTI</b><br>n=18,081     | 9,539                        | 13.1 (12.9 – 13.4)                | 1.35 (1.29-1.40)   | 1.25 (1.20-1.29)       |
| <b>2+ mild LRTI</b><br>n=6,133     | 3,629                        | 16.0 (15.5 – 16.5)                | 1.65 (1.55-1.76)   | 1.48 (1.40-1.57)       |
| <b>1 moderate LRTI</b><br>n=19,787 | 16,466                       | 12.8 (12.6 – 13.0)                | 1.37 (1.32-1.42)   | 1.30 (1.26-1.34)       |
| <b>2+ moderate LRTI</b><br>n=6,227 | 6,760                        | 16.5 (16.1 – 16.9)                | 1.82 (1.72-1.93)   | 1.62 (1.54-1.70)       |
| <b>1+ severe LRTI</b><br>n=6,932   | 8,053                        | 34.7 (34.0 – 35.5)                | 4.46 (4.22-4.72)   | 3.03 (2.87-3.18)       |

Legend: AECOPD (Acute Exacerbations of Chronic Obstructive Pulmonary Disease), LRTI (Lower Respiratory Tract Infection), IRR (Incidence Rate Ratio). PY (Person years). \*Adjusted for all baseline covariates listed in Table 1. Number of patients included crude and fully adjusted models N= 215,234.

**Table S4: Hazard ratios for all-cause mortality following COPD diagnosis in different categories of baseline frequency and severity of LRTI.**

| Baseline LRTI category             | n (%) of events<br>N=51,669 | Crude HR (95% CI) | Adjusted* HR (95% CI) |
|------------------------------------|-----------------------------|-------------------|-----------------------|
| <b>No LRTI</b><br>n=158,074        | 36,151 (22.9)               | Ref               | Ref                   |
| <b>1 mild LRTI</b><br>n=18,081     | 3,491 (19.3)                | 1.13 (1.09-1.17)  | 1.11 (1.07-1.15)      |
| <b>2+ mild LRTI</b><br>n=6,133     | 1,096 (17.9)                | 1.15 (1.08-1.22)  | 1.14 (1.08-1.22)      |
| <b>1 moderate LRTI</b><br>n=19,787 | 6,046 (30.6)                | 1.07 (1.04-1.09)  | 1.10 (1.07-1.13)      |
| <b>2+ moderate LRTI</b><br>n=6,227 | 2,183 (35.1)                | 1.20 (1.15-1.26)  | 1.22 (1.17-1.27)      |
| <b>1+ severe LRTI</b><br>n=6,932   | 2,702 (39.0)                | 2.77 (2.66-2.88)  | 1.92 (1.84-1.99)      |

Legend: AECOPD (Acute Exacerbations of Chronic Obstructive Pulmonary Disease), LRTI (Lower Respiratory Tract Infection), HR (Hazard Ratio). \*Adjusted for all baseline covariates listed in Table 1. Number of patients included crude and fully adjusted models N= 215,234.

**Table S5: Hazard ratios for COPD-related mortality following COPD diagnosis in different categories of baseline frequency and severity of LRTI**

| <b>Baseline LRTI category</b>       | <b>n (%) of events<br/>N=11,770</b> | <b>Crude HR (95% CI)</b> | <b>Adjusted* HR (95% CI)</b> |
|-------------------------------------|-------------------------------------|--------------------------|------------------------------|
| <b>No LRTI<br/>n=158,074</b>        | 7,886 (67.0)                        | Ref                      | Ref                          |
| <b>1 mild LRTI<br/>n=18,081</b>     | 823 (7.0)                           | 1.27 (1.18-1.36)         | 1.19 (1.11-1.28)             |
| <b>2+ mild LRTI<br/>n=6,133</b>     | 277 (2.4)                           | 1.40 (1.24-1.58)         | 1.29 (1.14-1.45)             |
| <b>1 moderate LRTI<br/>n=19,787</b> | 1,425 (12.1)                        | 1.13 (1.07-1.20)         | 1.13 (1.06-1.19)             |
| <b>2+ moderate LRTI<br/>n=6,227</b> | 546 (4.6)                           | 1.35 (1.24-1.47)         | 1.27 (1.16-1.39)             |
| <b>1+ severe LRTI<br/>n=6,932</b>   | 813 (6.9)                           | 4.01 (3.73-4.31)         | 2.32 (2.15-2.50)             |

Legend: AECOPD (Acute Exacerbations of Chronic Obstructive Pulmonary Disease), LRTI (Lower Respiratory Tract Infection), HR (Hazard ratio). \*Adjusted for all baseline covariates listed in Table 1. Number of patients included crude and fully adjusted models N= 215,234.

**Table S6: Hazard ratios for CVD-related mortality following COPD diagnosis in different categories of baseline frequency and severity of LRTI**

| Baseline LRTI category             | n (%) of events<br>N=13,116 | Crude HR (95% CI) | Adjusted* HR (95% CI) |
|------------------------------------|-----------------------------|-------------------|-----------------------|
| <b>No LRTI</b><br>n=158,074        | 9,325 (71.1)                | Ref               | Ref                   |
| <b>1 mild LRTI</b><br>n=18,081     | 875 (6.7)                   | 1.08 (1.01-1.16)  | 1.06 (0.99-1.14)      |
| <b>2+ mild LRTI</b><br>n=6,133     | 291 (2.2)                   | 1.16 (1.03-1.30)  | 1.17 (1.04-1.31)      |
| <b>1 moderate LRTI</b><br>n=19,787 | 1,432 (10.9)                | 0.99 (0.93-1.04)  | 1.03 (0.98-1.09)      |
| <b>2+ moderate LRTI</b><br>n=6,227 | 544 (4.1)                   | 1.17 (1.08-1.28)  | 1.20 (1.10-1.31)      |
| <b>1+ severe LRTI</b><br>n=6,932   | 649 (4.9)                   | 2.52 (2.33-2.73)  | 1.68 (1.55-1.82)      |

Legend: AECOPD (Acute Exacerbations of Chronic Obstructive Pulmonary Disease), LRTI (Lower Respiratory Tract Infection), HR (Hazard Ratio). \*Adjusted for all baseline covariates listed in Table 1. Number of patients included crude and fully adjusted models N= 215,234.



**Table S7: Incidence rates of at least one AECOPD (moderate or severe) following COPD diagnosis in different categories of baseline frequency and severity of LRTI (mild and moderate GP events combined)**

| Baseline LRTI category        | n (%) of events<br>N=948,576 | Rate 100py <sup>-1</sup> (95% CI) | Crude IRR (95% CI) | Adjusted* IRR (95% CI) |
|-------------------------------|------------------------------|-----------------------------------|--------------------|------------------------|
| <b>No LRTI</b><br>n=158,074   | 593,917                      | 71.7 (71.5 – 71.9)                | Ref                | Ref                    |
| <b>1 GP LRTI</b><br>n=34,849  | 197,612                      | 108.2 (107.7 – 108.7)             | 1.52 (1.20-1.55)   | 1.48 (1.46-1.50)       |
| <b>2+ GP LRTI</b><br>n=10,315 | 75,068                       | 136.7 (135.7 – 137.7)             | 1.95 (1.91-2.00)   | 1.83 (1.79-1.88)       |
| <b>3+ GP LRTI</b><br>n=5,064  | 51,646                       | 192.4 (190.7 – 194.1)             | 2.88 (2.78-2.97)   | 2.53 (2.45-2.61)       |
| <b>1+ HES LRTI</b><br>n=6,932 | 30,33                        | 130.8 (129.4 – 132.3)             | 2.05 (1.99-2.12)   | 1.76 (1.70-1.81)       |

Legend: AECOPD (Acute Exacerbations of Chronic Obstructive Pulmonary Disease), LRTI (Lower Respiratory Tract Infection), IRR (Incidence Rate Ratio). PY (Person years). \*Adjusted for all baseline covariates listed in Table 1. Number of patients included crude and fully adjusted models N= 215,234.

**Figure S1: Inclusion of COPD patients**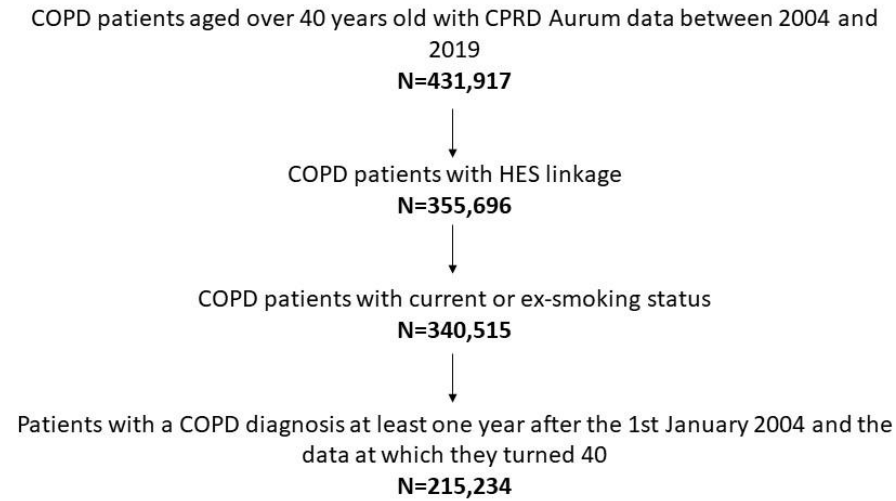

Legend: CPRD (Clinical Practice Research Datalink); HES (Hospital Episode Statistics)
